# Supplementary material
Source: Springer Nature journal article supplement (https://www.springermedizin.de/resource/supplementary/12961_2010_195_MOESM2_ESM.pdf/9571630)

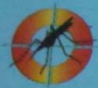

# Coartem<sup>®</sup> 20/120

WEI

Artemether Lumefantrine

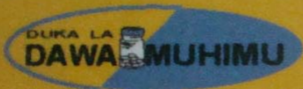

Ni rafiki wa kuaminika

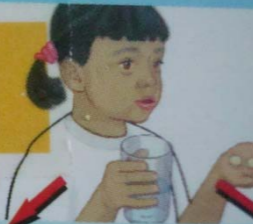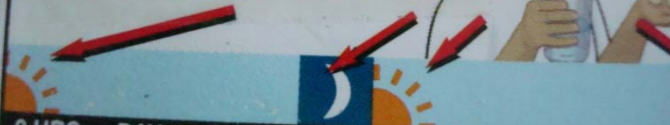

0 HRS

DAY 1

8 HRS

MORNING

DAY 2

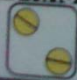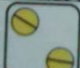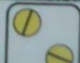

Supplement: MOESM2 [file 9571630]
